# Supplementary material for: Nasal microbiota clusters associate with inflammatory response, viral load, and symptom severity in experimental rhinovirus challenge
Source: PubMed Central journal article supplement (PMC6065324; doi:10.1038/s41598-018-29793-w), 2018-07-30
Supplement: 41598_2018_29793_MOESM1_ESM.pdf [file 41598_2018_29793_MOESM1_ESM.pdf]

**Title:**

Nasal microbiota clusters associate with inflammatory response, viral load, and symptom severity in experimental rhinovirus challenge

**Authors:**

Markus J. Lehtinen<sup>1\*</sup>, Ashley A. Hibberd<sup>2</sup>, Sofia Männikkö<sup>3</sup>, Nicolas Yeung<sup>1</sup>, Tommi Kauko<sup>3</sup>, Sofia Forssten<sup>1</sup>, Liisa Lehtoranta<sup>1</sup>, Sampo J. Lahtinen<sup>1</sup>, Buffy Stahl<sup>2</sup>, Anna Lyra<sup>1</sup>, and Ronald B. Turner<sup>4\*</sup>.

**Affiliations:**

1) Global Health & Nutrition Science, DuPont Nutrition and Health, Sokeritehtaantie 20, FI-02460 Kantvik, Finland

2) Genomics and Microbiome Science, DuPont Nutrition and Health, 3329 Agriculture Drive, Madison, WI 53716 US

3) 4Pharma Ltd., ElectroCity, Tykistökatu 4D, FI-20520 Turku, Finland

4) University of Virginia School of Medicine, P.O. Box 800386, Barringer Building, Room 4441, Hospital Drive, Charlottesville, VA 22908, US

**Corresponding author:**

Markus J. Lehtinen

Global Health & Nutrition Science, Danisco Sweeteners Oy, Sokeritehtaantie 20, FI-02460 Kantvik, Finland

E-mail: [markus.lehtinen@dupont.com](mailto:markus.lehtinen@dupont.com)

Tel: +358 40 139 7813

## Supplementary Information

### Supplementary Methods

#### DNA extraction from fecal and nasal samples

Microbial DNA was extracted from nasal swabs and purified with an automated MagMAX™ Sample Preparation System (Life Technologies, Halle, Belgium), by using the MagMAX™ Total Nucleic Acid Isolation Kit, AM1840 (ThermoFisher Scientific OY, Vantaa, Finland) according to the manufacturer's instructions with some modifications. The swabs were transferred into tubes to which 700 µl of PBS was added. The tubes were vortexed (45 s). The swabs were placed upside in tubes that were centrifuged at 10 000 x g (5 min). The supernatant was removed and 175 µl of PBS was added. Lysis/binding solution (235 µl) and the sample suspension was added to the bead tube and vortexed 3 x 30 s (6800 rpm) with a Precellys bead beater (Bertin Instruments, ThermoFisher Scientific). Afterwards manufacturer's instructions were followed.

Microbial DNA from fecal samples was extracted as in Mukerji et al. <sup>1</sup>. Briefly, DNA was extracted and purified with a commercial kit MagMAX™ Total Nucleic Acid Isolation Kit, using the MagMAX™ Express-96 (Applied Biosystems, Bridgewater, NJ, USA), followed by PCR inhibitor removal in 96-well format silica columns (OneStep-96™ PCR Inhibitor Removal Kit, Zymo Research, Irvine, CA, USA). The DNA concentration was determined with the Qubit™ 2.0 Fluorometer and Qubit® dsDNA HS Assay Kit reagents (Life Technologies, Darmstadt, Germany).

#### BI-04 quantitative PCR

BI-04 was quantified with strain specific primers (forward primer 5'-CTTCCCAGAAGGCCGGGT-3' and reverse primer 5'-CGAGGCCACGGTGCTCATATAGA-3',

amplicon length 98 base pairs, annealing temperature 60°C). The primers target a long-chain fatty acid CoA ligase gene present as a single copy per genome. The reactions were executed in a total volume of 15 µl: 1 x Fast SYBR Green Master mix (Applied Biosystems, Bridgewater, NJ, USA), 1 ng of template DNA and 1.5 pmol primers. The amplification and detection of DNA were performed with the 7500 Fast Real-Time PCR System (Applied Biosystems). For standard curves, 10-fold serial dilution from 10 ng to 100 fg of genomic DNA were used. Non-template and negative controls of *B. lactis* strain Bi-07 (genomic DNA 1ng) were used. Melt-curve assays were done after each run and the peaks of the samples were checked in reference to the target species (standard) peaks. No values detected below lowest standard or highest negative control, with a target-matching melt-curve, were accepted.

### **Microbiota sequencing and pre-processing**

The microbiota composition was analyzed using high throughput amplicon sequencing as previously described <sup>2</sup>. Briefly, the V4 variable region of the 16S rRNA gene of Bacteria and Archaea was amplified in triplicate PCR with primers 515F (5'-GTGCCAGCMGCCGCGGTAA) and 806R (5'GGACTACHVGGGTWTCTAAT) PCR products were purified, normalized by DNA concentration and the amplicon pool was sequenced using Illumina MiSeq technology with 2x250 bp reads (University of Illinois, Urbana-Champaign, W. M. Keck Center for Comparative and Functional Genomics). The sequencing data was analyzed using the Quantitative Insights Into Microbial Ecology pipeline (QIIME v. 1.8) <sup>3</sup>, and sequences were clustered into operational taxonomic units (OTUs) at 97% sequence similarity against the Greengenes database (v. 13.8) <sup>4</sup> using the default open reference clustering scheme in QIIME as described <sup>5</sup>. Taxa compositions are reported as relative abundance (% of total sequences) and were visualized using Prism (GraphPad Software, v. 7.0).<sup>4,6-9</sup>

## Supplementary Figures

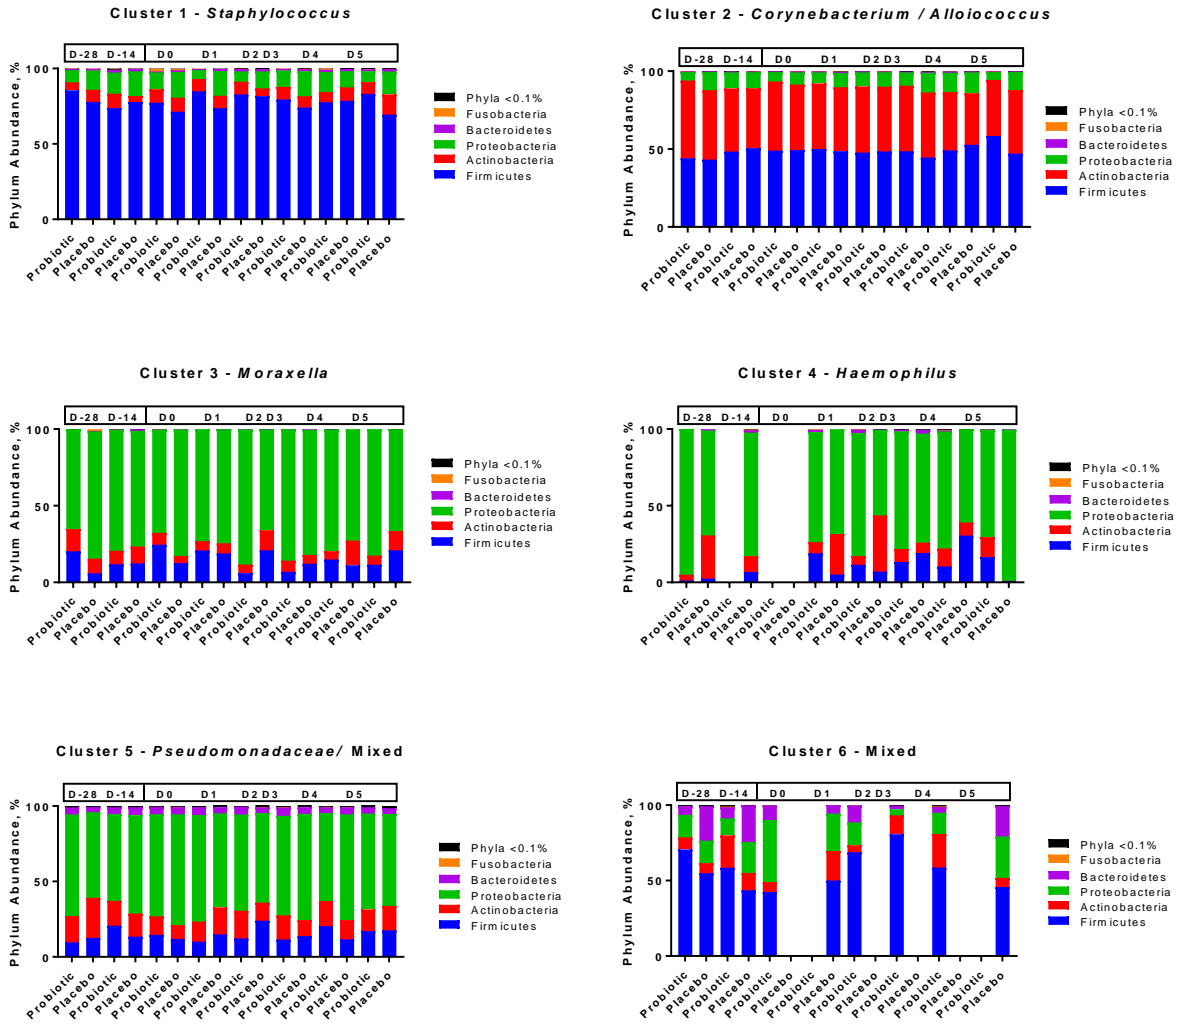

**Supplementary Figure 1.** The relative abundance (%) of bacterial phyla in the nasal microbiota in the six identified clusters.

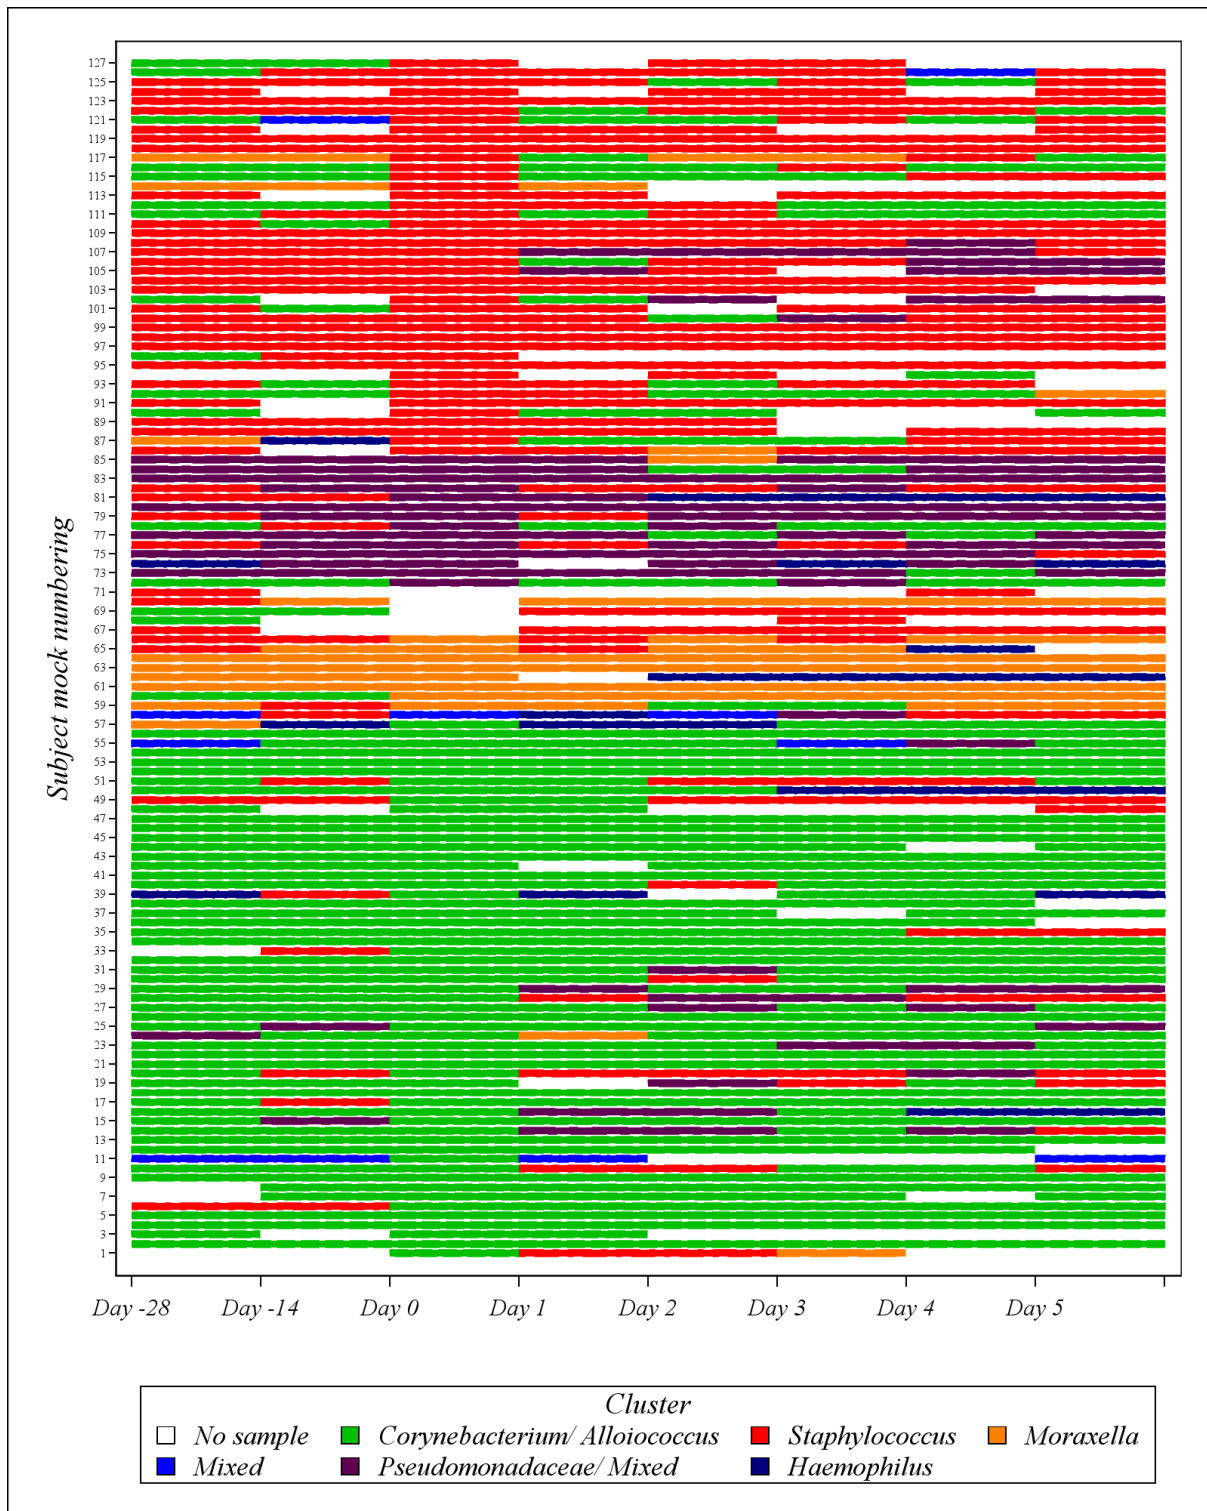

**Supplementary Figure 2.** Clusters assigned per subject and per timepoint. The subjects are in the order of D0 cluster assignments.

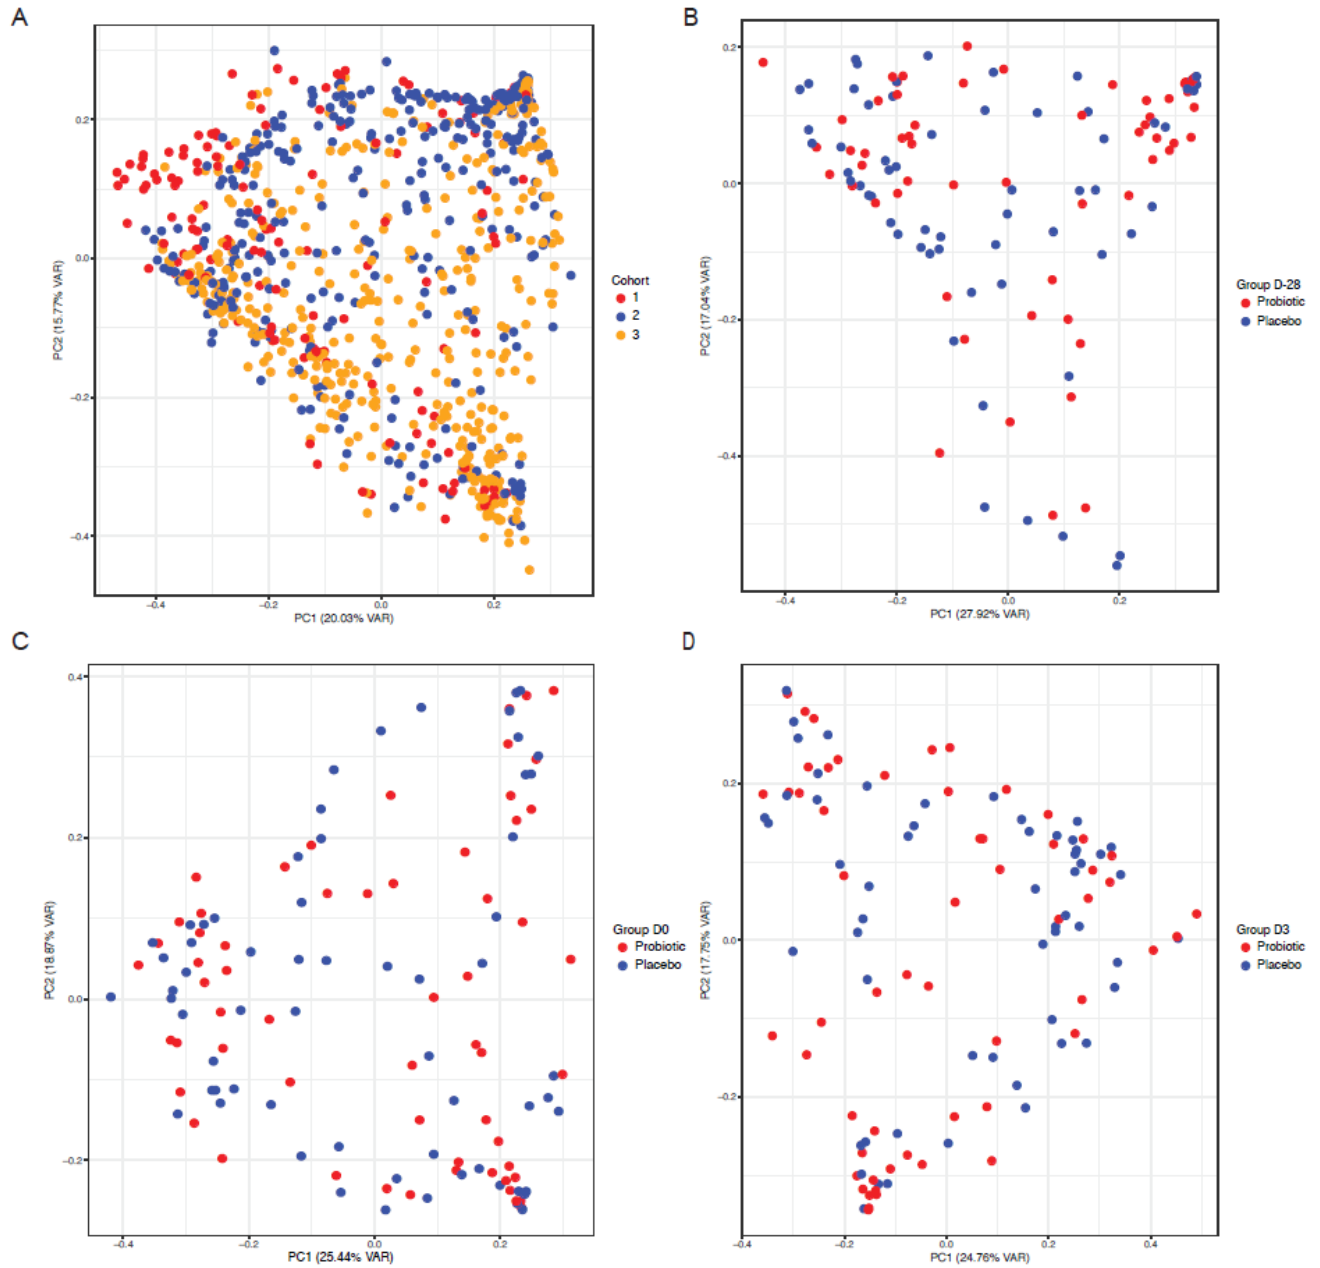

**Supplementary Figure 3.** Beta diversity in the nasal samples. Unweighted UniFrac PCoA plots. (a) between different cohorts, (b) between probiotic and placebo group on D-28 (baseline), (c)

between probiotic and placebo group on D0 (before infection), (d) between probiotic and placebo group on D3 (during infection).

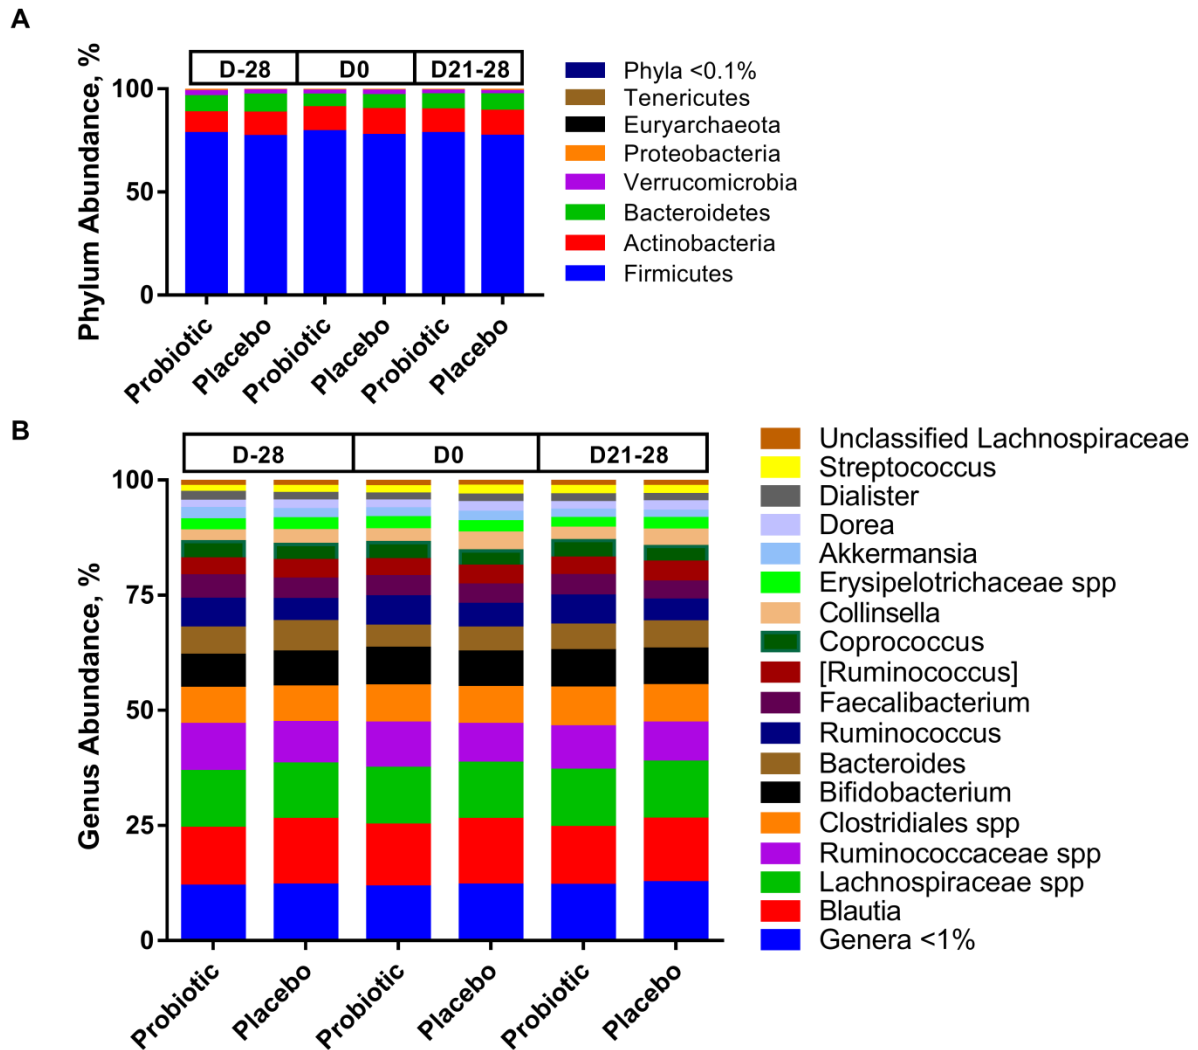

**Supplementary Figure 4.** The relative abundance (%) of bacterial a) phyla and b) genera in the fecal microbiota in the two study groups. The relative abundance of the samples showed that phyla and genera were representative of a typical intestinal microbiota. There was no statistical difference in the *Bifidobacterium* abundance in the probiotic group when compared to the placebo group respectively, at D-28 (7.2% vs 7.6%,  $P>0.1$ ), D0 (8.2% vs 7.8%,  $P>0.1$ ) or D28 (8.1% vs 7.9%,  $P>0.1$ ) Kruskal-Wallis test with Benjamini-Hochberg false discovery rate correction).



## SUPPLEMENTARY TABLES

**Supplementary Table 1.** Frequency of clusters by study day and treatment.

| Day  | Treatment        | Cluster name          |                                         |                  |                    |                                         |           |
|------|------------------|-----------------------|-----------------------------------------|------------------|--------------------|-----------------------------------------|-----------|
|      |                  | <i>Staphylococcus</i> | <i>Corynebacterium/<br/>Alloiooccus</i> | <i>Moraxella</i> | <i>Haemophilus</i> | <i>Pseudomona<br/>daceae/<br/>Mixed</i> | Mixed     |
| D-28 | Probiotic, N (%) | 21 (55 .3)            | 27 (43 .5)                              | 4 (44 .4)        | 1 (50)             | 5 (62 .5)                               | 2 (66 .7) |
|      | Placebo, N (%)   | 17 (44 .7)            | 35 (56 .5)                              | 5 (55 .6)        | 1 (50)             | 3 (37 .5)                               | 1 (33 .3) |
| D-14 | Probiotic, N (%) | 21 (61 .8)            | 21 (38 .9)                              | 3 (37 .5)        |                    | 8 (61 .5)                               | 1 (50)    |
|      | Placebo, N (%)   | 13 (38 .2)            | 33 (61 .1)                              | 5 (62 .5)        | 2 (100)            | 5 (38 .5)                               | 1 (50)    |
| D0   | Probiotic, N (%) | 22 (52 .4)            | 24 (42 .1)                              | 5 (62 .5)        |                    | 8 (57 .1)                               | 1 (100)   |
|      | Placebo, N (%)   | 20 (47 .6)            | 33 (57 .9)                              | 3 (37 .5)        |                    | 6 (42 .9)                               |           |
| D1   | Probiotic, N (%) | 18 (50)               | 26 (46 .4)                              | 3 (37 .5)        | 2 (66 .7)          | 8 (61 .5)                               |           |
|      | Placebo, N (%)   | 18 (50)               | 30 (53 .6)                              | 5 (62 .5)        | 1 (33 .3)          | 5 (38 .5)                               | 1 (100)   |
| D2   | Probiotic, N (%) | 18 (51 .4)            | 24 (46 .2)                              | 6 (60)           | 2 (66 .7)          | 7 (43 .8)                               | 1 (100)   |
|      | Placebo, N (%)   | 17 (48 .6)            | 28 (53 .8)                              | 4 (40)           | 1 (33 .3)          | 9 (56 .3)                               |           |
| D3   | Probiotic, N (%) | 22 (64 .7)            | 20 (38 .5)                              | 3 (37 .5)        | 3 (75)             | 8 (57 .1)                               | 1 (100)   |
|      | Placebo, N (%)   | 12 (35 .3)            | 32 (61 .5)                              | 5 (62 .5)        | 1 (25)             | 6 (42 .9)                               |           |
| D4   | Probiotic, N (%) | 16 (51 .6)            | 21 (42)                                 | 4 (57 .1)        | 4 (80)             | 11 (57 .9)                              | 1 (100)   |
|      | Placebo, N (%)   | 15 (48 .4)            | 29 (58)                                 | 3 (42 .9)        | 1 (20)             | 8 (42 .1)                               |           |
| D5   | Probiotic, N (%) | 20 (52 .6)            | 20 (43 .5)                              | 4 (50)           | 5 (83 .3)          | 9 (69 .2)                               |           |
|      | Placebo, N (%)   | 18 (47 .4)            | 26 (56 .5)                              | 4 (50)           | 1 (16 .7)          | 4 (30 .8)                               | 1 (100)   |

**Supplementary Table 2.** Cluster frequencies per cohort over all the time points and at D0.

| Cohort    | Cluster name |                |            |            |               |         |
|-----------|--------------|----------------|------------|------------|---------------|---------|
|           | <i>Staph</i> | <i>Cor/All</i> | <i>Mor</i> | <i>Hae</i> | <i>Ps/Mix</i> | Mix     |
| 1, N (%)  | 26 (18.1)    | 92 (63.9)      | 19 (13.2)  | 7 (4.9)    |               |         |
| 2, N (%)  | 143 (41.4)   | 150 (43.5)     | 39 (11.3)  | 8 (2.3)    | 1 (0.3)       | 4 (1.2) |
| 3, N (%)  | 119 (27.0)   | 187 (42.5)     | 8 (1.8)    | 10 (2.3)   | 109 (24.8)    | 7 (1.6) |
| Cohort D0 |              |                |            |            |               |         |
| 1, N (%)  | 4 (21.1)     | 12 (63.2)      | 3 (15.8)   |            |               |         |
| 2, N (%)  | 23 (51.1)    | 18 (47.4)      | 4 (8.9)    |            |               |         |
| 3, N (%)  | 15 (25.9)    | 24 (42.9)      | 1 (1.7)    |            | 14 (24.1)     | 1 (1.7) |

**Supplementary Table 3.** Comparison of nasal sample alpha-diversity (within sample diversity) by time and between treatment groups (placebo vs. probiotic).

| Day  | Treatment | N  | Phylogenetic Diversity<br>(Faith's metric) |       |                             | Shannon Diversity<br>Index |       |                             |
|------|-----------|----|--------------------------------------------|-------|-----------------------------|----------------------------|-------|-----------------------------|
|      |           |    | Mean                                       | SD    | FDR P<br>value <sup>a</sup> | Mean                       | SD    | FDR P<br>value <sup>a</sup> |
| D-28 | Probiotic | 60 | 9.063                                      | 4.765 | 0.535                       | 2.537                      | 1.509 | 0.891                       |
|      | Placebo   | 62 | 8.581                                      | 4.309 |                             | 2.501                      | 1.347 |                             |
| D-14 | Probiotic | 54 | 10.889                                     | 4.757 | 0.284                       | 2.988                      | 1.578 | 0.221                       |
|      | Placebo   | 59 | 9.878                                      | 5.016 |                             | 2.621                      | 1.516 |                             |
| D0   | Probiotic | 60 | 9.935                                      | 4.891 | 0.201                       | 2.709                      | 1.554 | 0.527                       |
|      | Placebo   | 63 | 8.947                                      | 3.677 |                             | 2.537                      | 1.370 |                             |
| D1   | Probiotic | 57 | 9.330                                      | 4.700 | 0.890                       | 2.621                      | 1.525 | 0.883                       |
|      | Placebo   | 60 | 9.451                                      | 4.379 |                             | 2.656                      | 1.333 |                             |
| D2   | Probiotic | 58 | 9.661                                      | 4.306 | 0.913                       | 2.656                      | 1.544 | 0.572                       |
|      | Placebo   | 59 | 9.752                                      | 4.648 |                             | 2.820                      | 1.454 |                             |
| D3   | Probiotic | 57 | 9.412                                      | 4.948 | 0.944                       | 2.621                      | 1.639 | 0.684                       |
|      | Placebo   | 56 | 9.467                                      | 4.519 |                             | 2.733                      | 1.376 |                             |
| D4   | Probiotic | 57 | 10.484                                     | 4.937 | 0.446                       | 2.986                      | 1.664 | 0.640                       |
|      | Placebo   | 57 | 9.751                                      | 4.841 |                             | 2.836                      | 1.507 |                             |
| D5   | Probiotic | 58 | 9.488                                      | 4.393 | 0.720                       | 2.546                      | 1.500 | 0.442                       |
|      | Placebo   | 54 | 9.170                                      | 4.337 |                             | 2.758                      | 1.325 |                             |

<sup>a</sup> Non-parametric t-test using 1000 Monte Carlo permutations and Benjamini-Hochberg false discovery rate (FDR) correction

**Supplementary Table 4.** Comparison of nasal beta diversity (between sample dissimilarity) by cluster, cohort, and between treatment groups at each study time point (placebo vs probiotic).

|            | Unweighted               | Unweighted           | Weighted                 | Weighted             |
|------------|--------------------------|----------------------|--------------------------|----------------------|
|            | UniFrac                  | UniFrac              | UniFrac                  | UniFrac              |
| Parameter  | PERMANOVA R <sup>2</sup> | P value <sup>a</sup> | PERMANOVA R <sup>2</sup> | P value <sup>a</sup> |
| Cluster    | 0.0508                   | 0.001                | 0.4889                   | <0.001               |
| Cohort     | 0.1310                   | 0.001                | 0.0722                   | 0.001                |
| Group D-28 | 0.0072                   | 0.630                | 0.0097                   | 0.291                |
| Group D-14 | 0.0089                   | 0.414                | 0.0118                   | 0.246                |
| Group D0   | 0.0068                   | 0.699                | 0.0020                   | 0.959                |
| Group D1   | 0.0046                   | 0.998                | 0.0053                   | 0.695                |
| Group D2   | 0.0068                   | 0.748                | 0.0026                   | 0.936                |
| Group D3   | 0.0065                   | 0.860                | 0.0095                   | 0.379                |
| Group D4   | 0.0071                   | 0.686                | 0.0049                   | 0.735                |
| Group D5   | 0.0056                   | 0.977                | 0.0096                   | 0.396                |

<sup>a</sup> PERMANOVA test, Adonis R-*vegan* package

**Supplementary Table 5.** Comparison of fecal sample alpha-diversity (within sample diversity) by time and between treatment groups (placebo vs probiotic). The alpha diversity was lower according to Shannon diversity index at all analyzed time-points for the fecal microbiota in the placebo group, including the baseline (FDR P= 0.014 (D-28), FDR P=0.016 (D0) and FDR P=0.024 (D28)).

| Day  | Treatment | N  | Phylogenetic Diversity<br>(Faith's metric) |        |                          | Shannon Diversity<br>Index |       |                          |
|------|-----------|----|--------------------------------------------|--------|--------------------------|----------------------------|-------|--------------------------|
|      |           |    | Mean                                       | SD     | FDR P value <sup>a</sup> | Mean                       | SD    | FDR P value <sup>a</sup> |
| D-28 | Probiotic | 70 | 87.203                                     | 14.925 | 0.035                    | 7.328                      | 0.438 | 0.014                    |
|      | Placebo   | 72 | 81.636                                     | 17.604 |                          | 7.105                      | 0.578 |                          |
| D0   | Probiotic | 72 | 86.500                                     | 16.652 | 0.121                    | 7.266                      | 0.423 | 0.016                    |
|      | Placebo   | 79 | 82.100                                     | 17.050 |                          | 7.063                      | 0.568 |                          |
| D28  | Probiotic | 73 | 86.701                                     | 16.558 | 0.075                    | 7.320                      | 0.491 | 0.024                    |
|      | Placebo   | 78 | 81.845                                     | 16.759 |                          | 7.124                      | 0.553 |                          |

<sup>a</sup> Non-parametric t-test using 1000 Monte Carlo permutations and Benjamini-Hochberg false discovery rate (FDR) correction

**Supplementary Table 6.** Comparison of fecal beta diversity (between sample dissimilarity) by cohort, and between treatment groups at each study time point (placebo vs probiotic).

| Parameter  | Unweighted        |                      | Weighted          |                      |
|------------|-------------------|----------------------|-------------------|----------------------|
|            | UniFrac           | Unweighted           | UniFrac           | Weighted             |
|            | PERMANOVA UniFrac | PERMANOVA UniFrac    | PERMANOVA UniFrac | PERMANOVA UniFrac    |
|            | R <sup>2</sup>    | P value <sup>a</sup> | R <sup>2</sup>    | P value <sup>a</sup> |
| Cohort     | 0.0059            | 0.001                | 0.0141            | 0.001                |
| Group D-28 | 0.0072            | 0.630                | 0.0097            | 0.291                |
| Group D0   | 0.0068            | 0.699                | 0.0020            | 0.959                |
| Group D28  | 0.0056            | 0.977                | 0.0096            | 0.396                |

<sup>a</sup> PERMANOVA test, Adonis R-*vegan* package

**Supplementary Table 7.** Demographics shown for subjects in nasal and fecal microbiome analyses.

|                         | Nasal swabs        |                  |                    | Fecal samples      |                  |                    |
|-------------------------|--------------------|------------------|--------------------|--------------------|------------------|--------------------|
|                         | Probiotic<br>N (%) | Placebo<br>N (%) | P-value            | Probiotic<br>N (%) | Placebo<br>N (%) | P-Value            |
| Gender                  |                    |                  |                    |                    |                  |                    |
| Male                    | 23 (38%)           | 29 (44%)         | 0.475 <sup>a</sup> | 27 (37%)           | 33 (42%)         | 0.546 <sup>a</sup> |
| Female                  | 38 (62%)           | 37 (56%)         |                    | 46 (63%)           | 46 (58%)         |                    |
| Race                    |                    |                  |                    |                    |                  |                    |
| Asian                   | 3 (5%)             | 9 (14%)          | 0.138 <sup>b</sup> | 3 (4%)             | 10 (13%)         | 0.094 <sup>b</sup> |
| Black                   | 6 (10%)            | 2 (3%)           |                    | 6 (8%)             | 2 (3%)           |                    |
| Other                   | 2 (3%)             | 1 (2%)           |                    | 2 (3%)             | 1 (1%)           |                    |
| White                   | 50 (82%)           | 54 (82%)         |                    | 62 (85%)           | 66 (84%)         |                    |
| Ethnicity               |                    |                  |                    |                    |                  |                    |
| Hispanic                | 2 (3%)             | 3 (5%)           | 1.000 <sup>b</sup> | 3 (4%)             | 4 (5%)           | 1.000 <sup>b</sup> |
| Non-hispanic            | 58 (95%)           | 62 (94%)         |                    | 69 (95%)           | 74 (94%)         |                    |
| Other                   | 1 (2%)             | 1 (2%)           |                    | 1 (1%)             | 1 (1%)           |                    |
| Age (yrs,<br>mean (SD)) | 22 (6)             | 22 (7)           | 0.766 <sup>c</sup> | 23 (6)             | 23 (7)           | 0.986 <sup>c</sup> |

<sup>a</sup> Chi-Square test

<sup>b</sup> Fisher's exact test

<sup>c</sup> T-test

## References

- 1 Mukerji, P. *et al.* Safety evaluation of AB-LIFE((R)) (Lactobacillus plantarum CECT 7527, 7528 and 7529): Antibiotic resistance and 90-day repeated-dose study in rats. *Food Chem Toxicol* **92**, 117-128, doi:10.1016/j.fct.2016.03.018 (2016).
- 2 Caporaso, J. G. *et al.* Ultra-high-throughput microbial community analysis on the Illumina HiSeq and MiSeq platforms. *ISME J* **6**, 1621-1624, doi:10.1038/ismej.2012.8 (2012).
- 3 Caporaso, J. G. *et al.* QIIME allows analysis of high-throughput community sequencing data. *Nat Methods* **7**, 335-336, doi:10.1038/nmeth.f.303 (2010).
- 4 DeSantis, T. Z. *et al.* Greengenes, a chimera-checked 16S rRNA gene database and workbench compatible with ARB. *Appl Environ Microbiol* **72**, 5069-5072, doi:10.1128/AEM.03006-05 (2006).
- 5 Ghulam, S. R. *et al.* Polydextrose changes the gut microbiome and attenuates fasting triglyceride and cholesterol levels in Western diet fed mice. *Scientific Reports* **7** (2017).
- 6 Aronesty, E. Command-line tools for processing biological sequence data. (2011).
- 7 Edgar, R. C. Search and clustering orders of magnitude faster than BLAST. *Bioinformatics* **26**, 2460-2461, doi:10.1093/bioinformatics/btq461 (2010).
- 8 Caporaso, J. G. *et al.* PyNAST: a flexible tool for aligning sequences to a template alignment. *Bioinformatics* **26**, 266-267, doi:10.1093/bioinformatics/btp636 (2010).
- 9 Price, M. N., Dehal, P. S. & Arkin, A. P. FastTree 2--approximately maximum-likelihood trees for large alignments. *PLoS One* **5**, e9490, doi:10.1371/journal.pone.0009490 (2010).
